# Supplementary material
Source: PubMed Central journal article supplement (PMC8106623)
Supplement: NIHMS1672795-supplement-1.pdf [file NIHMS1672795-supplement-1.pdf]

**Supplemental Figure:** Calibration plot for Mayo Delirium Prediction model using the validation cohort <sup>a</sup>.

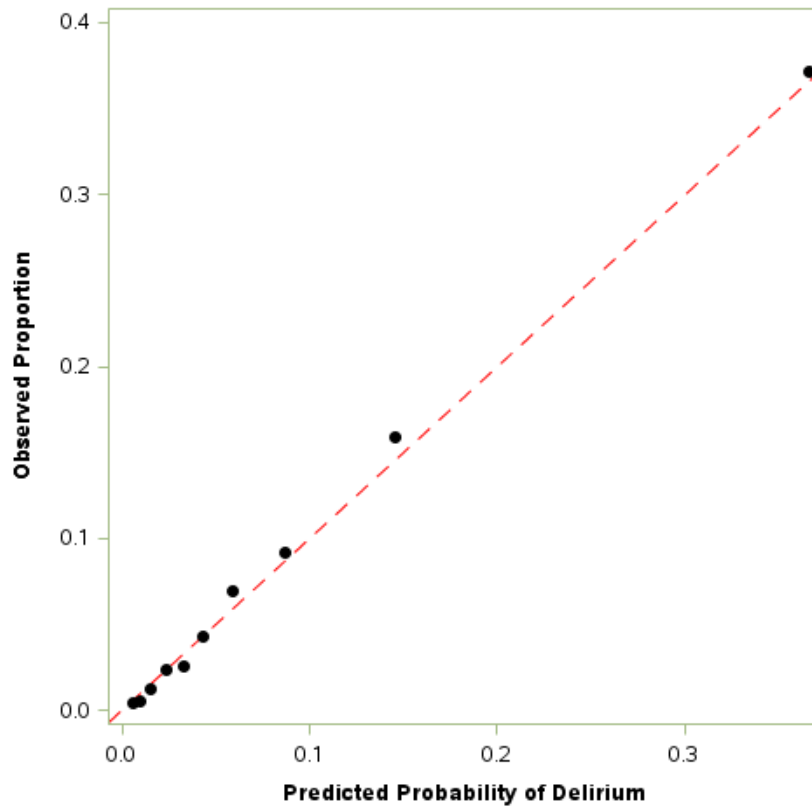

<sup>a</sup> Patients were grouped based on deciles of the predicted probability. The observed proportion of patients in a given group who experienced delirium during their hospital stay is plotted against the average predicted probability for that group. The line of identity, representing perfect calibration, is included as a reference.
