# Supplementary material
Source: PubMed Central journal article supplement (PMC8106623)
Supplement: NIHMS1672795-supplement-2.pdf [file NIHMS1672795-supplement-2.pdf]

**Supplemental Table 1:** Risk factor & demographic variables categorization and data

| <i>Risk factor variables categorization and data</i> | <i>N (%)</i>   | <i>N Missing</i> |
|------------------------------------------------------|----------------|------------------|
| <b><i>Categorical Variables</i></b>                  |                |                  |
| <b>Gender</b>                                        |                |                  |
| Male                                                 | 65962 (54.6%)  |                  |
| <b>Pressure ulcer</b>                                |                |                  |
| None                                                 | 118345 (98.0%) |                  |
| Stage 1                                              | 829 (0.7%)     |                  |
| Stage 2                                              | 1013 (0.8%)    |                  |
| Stage 3                                              | 144 (0.1%)     |                  |
| Stage 4                                              | 108 (0.1%)     |                  |
| Unstageable/unspecified                              | 325 (0.3%)     |                  |
| <b>Fracture</b>                                      |                |                  |
| None                                                 | 116021 (96.1%) |                  |
| Head/neck                                            | 742 (0.6%)     |                  |
| Thorax (Rib Cage)                                    | 1792 (1.5%)    |                  |
| Spine/pelvis                                         | 451 (0.4%)     |                  |
| Hip/thigh                                            | 1532 (1.3%)    |                  |
| Knee/ankle/lower leg                                 | 226 (0.2%)     |                  |
| <b>Polypharmacy</b>                                  |                |                  |
| None                                                 | 5369 (4.5%)    |                  |
| <5                                                   | 29807 (24.7%)  |                  |
| 5-9                                                  | 24132 (20.0%)  |                  |
| 10-14                                                | 22054 (18.3%)  |                  |
| 15-19                                                | 28323 (23.5%)  |                  |
| ≥20                                                  | 11079 (9.2%)   |                  |
| <b>Medication Classification Types</b>               |                |                  |
| Non-narcotic Analgesics                              | 105474 (87.3%) |                  |
| Proton pump inhibitors                               | 35140 (29.1%)  |                  |
| Narcotic analgesics                                  | 89511 (74.1%)  |                  |
| Sedatives                                            | 6913 (5.7%)    |                  |
| Anti-depressant                                      | 23880 (19.8%)  |                  |
| Anesthetic                                           | 64600 (53.5%)  |                  |
| Benzodiazepines                                      | 74439 (61.6%)  |                  |
| Central nervous system<br>stimulant                  | 60443 (50.1%)  |                  |
| Steroid                                              | 8913 (7.4%)    |                  |
| Anti-epileptic                                       | 5575 (4.6%)    |                  |
| Anti-cholinergic                                     | 10505 (8.7%)   |                  |
| Anti-psychotic                                       | 44539 (36.9%)  |                  |
| Narcotic antagonist                                  | 20167 (16.7%)  |                  |
| Muscle relaxant                                      | 2922 (2.4%)    |                  |
| Cholinergic                                          | 3360 (2.8%)    |                  |
| Anti-Parkinson                                       | 3393 (2.8%)    |                  |
| Chemotherapy                                         | 1845 (1.5%)    |                  |

|                                                         |               |       |
|---------------------------------------------------------|---------------|-------|
| Anti-dementia                                           | 1003 (0.8%)   |       |
| Anti-inflammatory                                       | 500 (0.4%)    |       |
| Bladder relaxant                                        | 309 (0.3%)    |       |
| <b>History of Delirium</b>                              | 2558 (2.1%)   |       |
| <b>Lab Results</b>                                      |               |       |
| White blood cell count > 12*10 <sup>9</sup> cells/liter | 27080 (25.9%) | 16310 |
| Hemoglobin < 10g/dl                                     | 22224 (21.3%) | 16308 |
| Creatinine > 1.5mg/dl                                   | 12338 (12.1%) | 18412 |
| Creatinine > 2 mg/dl                                    | 6478 (6.3%)   | 18412 |
| Sodium < 130 mmol/dl                                    | 3264 (3.4%)   | 25134 |
| Potassium < 3 mmol/dl                                   | 776 (0.8%)    | 23444 |
| Hypoxia (SpO2 <90)                                      | 951 (0.8%)    | 2179  |
| <b>Comorbidities</b>                                    |               |       |
| Coronary artery disease                                 | 39271 (32.5%) |       |
| Diabetes                                                | 39905 (33.0%) |       |
| Congestive heart failure                                | 22301 (18.5%) |       |
| Chronic obstructive pulmonary disease                   | 17074 (14.1%) |       |
| Atrial fibrillation                                     | 25055 (20.8%) |       |
| Cerebrovascular accident                                | 12531 (10.4%) |       |
| Chronic kidney disease                                  | 20822 (17.2%) |       |
| Cancer                                                  | 802 (0.7%)    |       |
| Sleep Disorder                                          | 32717 (27.1%) |       |
| Depression/Anxiety Disorder                             | 24427 (20.2%) |       |
| Other Psychiatric disorders                             | 13433 (11.1%) |       |
| Dementia                                                | 8853 (7.3%)   |       |
| Fever (temperature > 38)                                | 1110 (0.9%)   | 2498  |
| <b>Functional Status</b>                                |               |       |
| ADL Bathing score                                       |               | 27456 |
| 1 – Independent                                         | 79380 (85.1%) |       |
| 2 – Partially dependent                                 | 10910 (11.7%) |       |
| 3 – Totally dependent                                   | 3018 (3.2%)   |       |
| ADL Eating score                                        |               | 28066 |
| 1 – Independent                                         | 91298 (98.5%) |       |
| 2 – Partially dependent                                 | 1105 (1.2%)   |       |
| 3 – Totally dependent                                   | 295 (0.3%)    |       |
| ADL Mobility score                                      |               | 28349 |
| 1 – Independent                                         | 69455 (75.2%) |       |
| 2 – Partially dependent                                 | 21067 (22.8%) |       |
| 3 – Totally dependent                                   | 1893 (2.1%)   |       |
| ADL Toileting score                                     |               | 27420 |
| 1 – Independent                                         | 82338 (88.2%) |       |
| 2 – Partially dependent                                 | 11000 (11.8%) |       |

|                                         |               |                  |
|-----------------------------------------|---------------|------------------|
| 3 – Totally dependent                   | 6 (0.01%)     | 27283            |
| ADL Oral Care score                     |               |                  |
| 1 – Independent                         | 87989 (94.1%) |                  |
| 2 – Partially dependent                 | 4046 (4.3%)   |                  |
| 3 – Totally dependent                   | 1446 (1.6%)   |                  |
| Hearing Impairment                      |               | 51619            |
| 1 – No Impairment                       | 64836 (93.8%) |                  |
| 2 – Mild hearing problems               | 516 (0.8%)    |                  |
| 3 – Severe hearing impairment           | 3793 (5.5%)   |                  |
| Visual Impairment                       |               | 26820            |
| 1 – No Impairment                       | 13417 (14.3%) |                  |
| 2 – Mild vision problems (uses glasses) | 80089 (85.3%) |                  |
| 3 – Severe vision impairment            | 438 (0.5%)    |                  |
| Intensive Care Unit admission           | 26303 (21.8%) |                  |
| Anesthesia type                         |               |                  |
| General                                 | 35381 (29.3%) |                  |
| Local                                   | 436 (0.4%)    |                  |
| Regional Block                          | 4252 (3.5%)   |                  |
| Sedation                                | 3571 (3.0%)   |                  |
| Surgical Type:                          |               |                  |
| Thoracic (Cardiac, Lung and Rib)        | 4611 (3.8%)   |                  |
| Orthopedic                              | 1019 (0.8%)   |                  |
| Head                                    | 1388 (1.1%)   |                  |
| Neuro (Cranial & Spine)                 | 4448 (3.7%)   |                  |
| Abdominal                               | 8424 (7.0%)   |                  |
| Emergency Surgery type                  | 31580 (26.2%) |                  |
| <i>Continuous Variables</i>             | <i>Value</i>  | <i>N Missing</i> |
| Age                                     |               |                  |
| Mean ± SD                               | 68.0 ± 10.9   |                  |
| Median (Q1, Q3)                         | 67 (59, 76)   |                  |
| Min, Max                                | 50, 111       |                  |
| Fall Risk Score                         |               | 2061             |
| Mean ± SD                               | 2.6 ± 2.4     |                  |
| Median (Q1, Q3)                         | 2 (1, 4)      |                  |
| Min, Max                                | 0, 16         |                  |
| Weighted Charlson Index                 |               |                  |
| Mean ± SD                               | 3.0 ± 2.9     |                  |
| Median (Q1, Q3)                         | 2 (1, 4)      |                  |
| Min, Max                                | 0, 20         |                  |
| Age Weighted Charlson Index             |               |                  |
| Mean ± SD                               | 5.4 ± 3.3     |                  |
| Median (Q1, Q3)                         | 5 (3, 7)      |                  |

|                                         |             |
|-----------------------------------------|-------------|
| Min, Max                                | 1, 23       |
| <b>Transfusion Red Blood Cell units</b> |             |
| Mean ± SD                               | 0.2 ± 1.2   |
| Median (Q1, Q3)                         | 0 (0, 0)    |
| Min, Max                                | 0, 87.7     |
| <i>Delirium Positive</i>                | 9738 (8.1%) |

**Demographic distribution by Race and Ethnicity:**

|                                   | Derivation<br>(n=80000) | validation<br>(n=40764) | Total<br>(n=120764) |
|-----------------------------------|-------------------------|-------------------------|---------------------|
| <b>Race, n (%)</b>                |                         |                         |                     |
| Asian                             | 740 (0.9%)              | 364 (0.9%)              | 1104 (0.9%)         |
| Black/African American            | 1041 (1.3%)             | 509 (1.2%)              | 1550 (1.3%)         |
| Native American/Alaskan<br>Native | 343 (0.4%)              | 208 (0.5%)              | 551 (0.5%)          |
| Native Hawaii/Pacific<br>Islander | 68 (0.1%)               | 37 (0.1%)               | 105 (0.1%)          |
| Other                             | 1357 (1.7%)             | 684 (1.7%)              | 2041 (1.7%)         |
| Unknown                           | 1201 (1.5%)             | 604 (1.5%)              | 1805 (1.5%)         |
| White                             | 75250 (94.1%)           | 38358 (94.1%)           | 113608 (94.1%)      |
| <b>Ethnicity, n (%)</b>           |                         |                         |                     |
| Hispanic/Latino                   | 1046 (1.3%)             | 520 (1.3%)              | 1566 (1.3%)         |
| Not Hispanic/Latino               | 75571 (94.5%)           | 38578 (94.6%)           | 114149 (94.5%)      |
| Unknown                           | 3383 (4.2%)             | 1666 (4.1%)             | 5049 (4.2%)         |
