# Supplementary material
Source: PubMed Central journal article supplement (PMC8106623)
Supplement: NIHMS1672795-supplement-3.pdf [file NIHMS1672795-supplement-3.pdf]

**Supplemental Table 2:** Penalized logistic regression coefficients and corresponding odds ratio (OR) estimates for the Mayo Delirium Prediction model<sup>a</sup>

| Predictor                                               | <i>Medical</i> |      | <i>Surgical</i> |      |
|---------------------------------------------------------|----------------|------|-----------------|------|
|                                                         | Coefficient    | OR   | Coefficient     | OR   |
| Intercept                                               | -3.44          |      | -5.46           |      |
| Age (years)                                             |                |      | 0.02            | 1.02 |
| History of delirium                                     | 0.38           | 1.46 |                 |      |
| Emergency Department admission (Not elective)           |                |      | 0.48            | 1.62 |
| White blood cell count (>12x10 <sup>9</sup> cell/liter) | 0.05           | 1.05 | 0.18            | 1.20 |
| Hemoglobin (<10 g/dL)                                   | 0.06           | 1.06 | 0.04            | 1.04 |
| Creatinine (>1.5 mg/dL)                                 | 0.12           | 1.13 | 0.47            | 1.60 |
| Sodium (<130 mmol/dl)                                   | 0.14           | 1.15 |                 |      |
| Dementia                                                | 0.77           | 2.16 | 1.25            | 3.49 |
| Congestive heart failure                                | 0.01           | 1.01 |                 |      |
| Chronic obstructive pulmonary disease                   |                |      | 0.02            | 1.02 |
| Atrial fibrillation                                     | 0.07           | 1.07 | 0.26            | 1.30 |
| Psychiatric disorder                                    |                |      | 0.24            | 1.27 |
| Narcotic analgesic                                      | 0.02           | 1.02 |                 |      |
| Narcotic antagonist                                     | 0.09           | 1.09 | 0.10            | 1.11 |
| Fracture <sup>b</sup>                                   | 0.23           | 1.26 | 0.31            | 1.36 |
| Pressure Ulcer (any stage)                              | 0.44           | 1.55 | 0.69            | 1.99 |
| Red blood cell transfusion                              |                |      | 0.12            | 1.13 |
| Fall risk score                                         | 0.21           | 1.23 | 0.13            | 1.14 |
| Intensive care unit admit                               | 0.92           | 2.51 | 1.25            | 3.49 |
| Charlson score (0 to 5) <sup>c</sup>                    | 0.02           | 1.02 | 0.07            | 1.07 |

<sup>a</sup>Model derivation was performed using the retrospective derivation cohort (n=80,000). Age, Fall risk score, and Charlson score were modeled as continuous variables and all other predictors were modeled as dichotomous variables.

<sup>b</sup>The following fractures were included: head/neck, hip/thigh, knee/ankle/lower leg, spine/pelvis, and thorax.

<sup>c</sup>Charlson scores >5 were assigned a value of 5.
